# Supplementary material for: Combinations of immuno-checkpoint inhibitors predictive biomarkers only marginally improve their individual accuracy
Source: J Transl Med. 2019 Apr 23;17:131. doi: 10.1186/s12967-019-1865-8 (PMC6480695; doi:10.1186/s12967-019-1865-8)
Supplement: Supplementary file 3 — Additional file 3: Table S2. Overview of responders and non-responders across datasets where both DNA and RNA data are available. [file 12967_2019_1865_MOESM3_ESM.xlsx]

## Sheet: Sheet1
Dataset	Responders	Non-responders
Hugo	13	13
Riaz	29	15
VanAllen	19	21
